# Supplementary material for: Integrative Clustering of Neurobiological and Symptomatic Dimensions Reveals Major Depressive Disorder Subtypes with Brain-Symptom-Treatment Coherence
Source: Research Square preprint supplement (doi:10.21203/rs.3.rs-8312695/v1), 2025-12-16

# Supplementary Materials

for the paper:

**Integrative Clustering of Neurobiological and Symptomatic Dimensions Reveals Major Depressive Disorder Subtypes with Brain-Symptom-Treatment Coherence**

Figure S1. Bar plot showing the cross-cohort consistencies within HAMD factors and HAMD total score, quantified by Spearman's  $\rho$ .

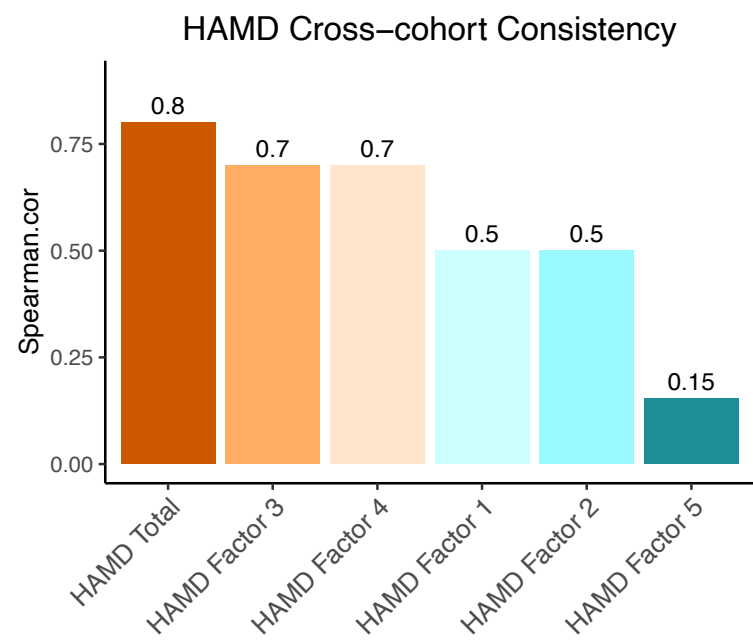

**Figure S2.** Scatter plot showing the correlation between FPTC mean ALFF and HAMD total score across 5 MDD groups with linear fitting.

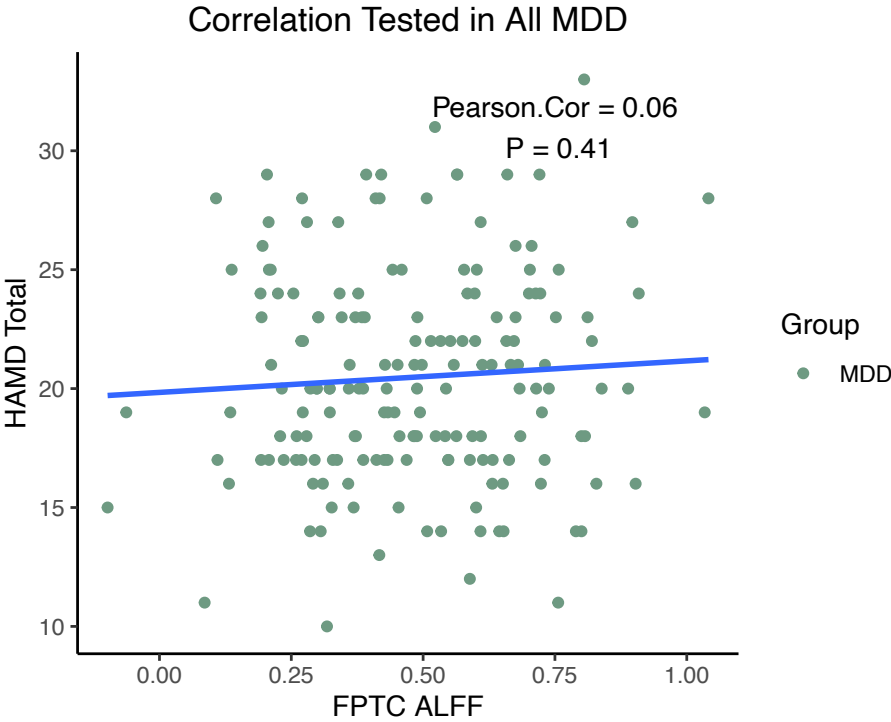

Supplement: Supplementary file 1 [file f23958f3af5b60ea32b7baa6.pdf]
